# Supplementary material for: Proteomic responses of carotenoid and retinol administration to Mongolian gerbils
Source: Royal Society of Chemistry journal article supplement (doi:10.1039/c8fo00278a), 2018-01-01
Supplement: c8fo00278a1.pdf [file c8fo00278a1.pdf]

## 1 Supplemental materials

2 **Table 1.** Proteins significantly differentially regulated ( $p < 0.05$ , expression  $> \pm 1.5$ ) 12 h postprandial in the liver of Mongolian Gerbils after  
3 receiving either a single dose of carotenoids lycopene (LYC), lutein (LUT), all-*trans*  $\beta$ -carotene (ATBC), retinol (ROL) or control (Cremophor  
4 EL solution). Protein functionality (biological process involvement and protein type) according to UniProt ([www.uniprot.org](http://www.uniprot.org)). As isoforms  
5 were determined also, proteins could also be in part up-and down-regulated at the same time.

comparison against vehicle

| LUT | ATBC | LYC | ROL | Protein name                              | abbreviation | gene abbreviation* | protein abbreviation* | biological process      | protein category      | Mascot confidence score** | alternative proteins                                           |
|-----|------|-----|-----|-------------------------------------------|--------------|--------------------|-----------------------|-------------------------|-----------------------|---------------------------|----------------------------------------------------------------|
| ↑↑  | ↑↑   | ↑↑  |     | 3-ketoacyl-CoA thiolase A, peroxisomal    | ACAA1A       | ACAA1A             | THIKA                 | fatty acid metabolism   | lipid metabolism      | 377                       | Fructose-bisphosphate aldolase B                               |
| ↑↑  |      |     |     | 3-ketoacyl-CoA thiolase B, peroxisomal    | ACAA1B       | ACAA1B             | THIKB                 | fatty acid metabolism   | lipid metabolism      | 296                       | Aspartate aminotransferase, mitochondrial                      |
|     |      | ↓   | ↓   | Actin, cytoplasmic 1                      | ACTB         | ACTB               | ACTB                  | cytoskeleton filament   | structure             | 358, 370, 607, 976,       |                                                                |
|     |      | ↓↓  | ↓↓  | Aldehyde dehydrogenase, mitochondrial     | ALDH2        | ALDH2              | ALDH2                 | oxidoreductase          | detoxification        | 638, 126,                 | Argininosuccinate lyase                                        |
|     |      | ↓↓  |     | Aldo-keto reductase type L16              | AKR          | AKR-L16            | Q05KR4                | oxidoreductase          | detoxification        | 371                       | Ornithine carbamoyltransferase, mitochondrial                  |
| ↑↑  |      |     |     | Alpha-enolase                             | ENO1         | ENO1               | ENOA                  | glycolytic process      | energy metabolism     | 413                       | Aldehyde dehydrogenase, mitochondrial                          |
|     |      | ↑↑  | ↑↑  | Apolipoprotein A-I                        | APOA1        | APOA1              | APOA1                 | lipid metabolism        | lipid metabolism      | 167, 139,                 |                                                                |
| ↓↓  |      | ↓↓  | ↓↓  | Argininosuccinate lyase                   | ASL          | ASL                | ARYL                  | amino acid biosynthesis | protein metabolism    | 514, 79                   |                                                                |
| ↑↑  | ↑↑   |     |     | Aspartate aminotransferase, mitochondrial | ASP1         | GOT2               | AATM                  | amino acid binding      | protein metabolism    | 496, 248,                 | 3-ketoacyl-CoA thiolase B, peroxisomal                         |
|     |      | ↓↓  | ↓↓  | ATP synthase subunit beta, mitochondrial  | ATPB         | ATPB               | ATP5B                 | ATP hydrolysis          | energy metabolism     | 882, 1070                 |                                                                |
|     |      | ↓↓  |     | Bile salt sulfotransferase-like           | SULT2A1      | LOC106157106       | A0A1S3HPU2            | bile acid metabolism    | other metabolism      | 114                       |                                                                |
|     |      | ↓↓  |     | Carbonyl reductase (Nadph) 1              | CRBR1        | CBR1               | CBR1                  | nucleotide binding      | nucleotide metabolism | 158, 160,                 | Omega-amidase NIT2 isoform X1, bile salt sulfotransferase-like |
| ↓   | ↓    | ↓   | ↓   | Carbonyl reductase (Nadph) 3              | CRBR3        | CBR3               | CBR3                  | nucleotide binding      | nucleotide metabolism | 288, 73, 231              | Omega-amidase NIT2 , Purine nucleoside phosphorylase           |
|     |      |     | ↓   | Cytochrome b5                             | CYB5A        | CYB5A              | CYB5A                 | electron                | energy                | 415, 803, 1020            | Eukaryotic translation                                         |

|    |    |    |    |                                                     |       |          |       |                           |                    |                                        |                                                                                       |
|----|----|----|----|-----------------------------------------------------|-------|----------|-------|---------------------------|--------------------|----------------------------------------|---------------------------------------------------------------------------------------|
|    |    |    |    |                                                     |       |          |       | transport                 | metabolism         |                                        | initiation factor 5A-1                                                                |
|    |    | ↓↓ |    | Cytoplasmic aconitate hydratase                     | ACO1  | ACO1     | ACOC  | cellular iron homeostasis | transport          | 107, 344                               |                                                                                       |
|    | ↑↑ | ↑↑ |    | D-beta-hydroxybutyrate dehydrogenase, mitochondrial | BDH1  | BDH1     | BDH   | oxidoreductase            | lipid metabolism   | 225                                    | Hydroxyacyl-coenzyme A dehydrogenase, mitochondrial                                   |
|    |    | ↓  | ↓  | Elongation factor 2                                 | EEF2  | EEF2     | EF2   | protein biosynthesis      | protein metabolism | 256, 236                               | Cytoplasmic aconitate hydratase                                                       |
| ↑  | ↑  | ↓  |    | Fructose-bisphosphate aldolase B                    | ALDOB | ALDOB    | ALDOB | glycolytic process        | energy metabolism  | 430, 549, 499, 597,                    | 3-ketoacyl-CoA thiolase A, peroxisomal, Alcohol dehydrogenase 1                       |
|    |    | ↓↓ | ↓↓ | Glutathione S-transferase Mu 7                      | GSTM7 | GSTM7    | GSTM7 | acetylation               | detoxification     | 448                                    |                                                                                       |
|    |    | ↑↓ | ↓  | Glutathione-S-transferase Yb-3                      | GSTM3 | GSTM3    | GSTM4 | acetylation               | detoxification     | 62, 201, 366, 476, 578, 512, 564, 411, |                                                                                       |
|    | ↓  | ↓  | ↓  | Hemoglobin, subunit alpha                           | HBA   | HBA1     | HBA   | oxygen transport          | transport          | 92, 278, 247, 510, 120,                |                                                                                       |
|    |    | ↑↑ |    | Keratin, type II cytoskeletal 8                     | KRT8  | KRT8     | K2C8  | Intermediate filament     | structure          | 158, 409                               |                                                                                       |
| ↑  |    |    | ↓  | Ornithine carbamoyltransferase, mitochondrial       | OTC   | OTC      | OTC   | amino acid binding        | protein metabolism | 133, 119                               | Eukaryotic translation initiation factor 3 subunit I , Glutathione S-transferase Yb-3 |
| ↓↓ | ↓↓ |    |    | Peroxiredoxin-1                                     | PER1  | PRDX1    | PRDX1 | redox homeostasis         | detoxification     | 248, 120                               |                                                                                       |
|    |    |    | ↑↑ | Protein disulfide-isomerase                         | PDI   | P4HB     | PDIA1 | redox homeostasis         | protein metabolism | 485                                    | 60 kDa heat shock protein, mitochondrial (Fragments)                                  |
| ↑  | ↑  | ↑  |    | selenium-binding protein 1                          | SBP1  | SELENBP1 | SBP1  | Se-binding                | transport          | 420                                    |                                                                                       |
|    |    | ↑  |    | Serum albumin                                       | ALB   | ALB      | ALBU  | transport - metal binding | transport          | 1080, 962, 1270, 1190, 851             |                                                                                       |
| ↓↓ | ↓↓ |    |    | Translationally-controlled tumor protein            | TPT1  | TPT1     | TCTP  | calcium binding           | structure          | 242                                    | Peroxiredoxin-1                                                                       |
|    |    | ↓↓ |    | UDP-glucose 6-dehydrogenase                         | UGDH  | UGDH     | UGDH  | NAD binding               | other metabolism   | 74                                     | Glutamate dehydrogenase 1, mitochondrial                                              |

- 6 ↑↑ up-regulated compared to control (vehicle); all isoforms significantly up-regulated  
7 ↑ partly up-regulated compared to control (vehicle), some isoforms significantly up-regulated  
8 ↓↓ down-regulated compared to control (vehicle); all isoforms significantly down-regulated  
9 ↓ partly down-regulated compared to control (vehicle), some isoforms significantly down-regulated  
10 ↑↓ up- and down-regulated compared to control (vehicle)  
11 \*according to UniProt ([www.uniprot.org](http://www.uniprot.org)); \*\*values in 1 cell indicating the different isoforms  
12

13 **Table 2.** Proteins significantly differentially regulated ( $p < 0.05$ , expression  $> \pm 1.5$ ) 12 h postprandial in the white adipose tissue of Mongolian Gerbils  
 14 after receiving either a single dose of carotenoids lycopene (LYC), lutein (LUT), all-*trans*  $\beta$ -carotene (ATBC), retinol (ROL) or control (Cremophor EL  
 15 solution). Protein functionality (biological process involvement and protein type) according to UniProt ([www.uniprot.org](http://www.uniprot.org)).

| comparison against. vehicle |      |     |     | protein name                                                    | abbreviation | gene abbreviation* | protein abbreviation* | biological process             | protein category            | Mascot confidence score**                | alternative protein    |
|-----------------------------|------|-----|-----|-----------------------------------------------------------------|--------------|--------------------|-----------------------|--------------------------------|-----------------------------|------------------------------------------|------------------------|
| LUT                         | ATBC | LYC | ROL |                                                                 |              |                    |                       |                                |                             |                                          |                        |
|                             |      |     | ↓↓  | 14-3-3 protein beta/alpha                                       | YWHAB        | YWHAB              | 1433B                 | signalling cascade             | other metabolism            | 134                                      |                        |
|                             |      |     | ↑   | Actin, aortic smooth muscle                                     | ACTA2        | ACTA2              | ACTA                  | cell motility                  | structure                   | 190, 155, 536, 182, 833, 287, 1030, 500, |                        |
|                             |      |     | ↑↑  | Adenylate kinase isoenzyme 1                                    | AK1          | AK1                | KAD1                  | ATP regeneration               | energy metabolism           | 380                                      |                        |
|                             |      | ↓   | ↓↓  | Adiponectin                                                     | ADIPO        | ADIPOQ             | ADIPO                 | hormone, lipid differentiation | lipid metabolism            | 292, 255, 152                            | Prohibitin (Fragments) |
|                             |      | ↓   | ↓   | Cytochrome b5                                                   | CYB5A        | CYB5A              | CYB5A                 | electron transport             | energy metabolism           | 112, 581                                 |                        |
| ↓↓                          |      |     |     | Cytoplasmic dynein 1 intermediate chain 2                       | CD1IC        | Dync1i2            | DC1I2                 | microtubule motor activity     | structure                   | 87                                       |                        |
|                             | ↓↓   |     | ↓↓  | D-dopachrome decarboxylase                                      | DDT          | DDT                | DOPD                  | immune system                  | immune system, inflammation | 309                                      |                        |
| ↑↑                          | ↑    |     |     | Desmin                                                          | DES          | DES                | DESM                  | cytoskeletal protein binding   | structure                   | 1050, 189, 309                           |                        |
| ↓↓                          |      |     | ↓↓  | Endoplasmic reticulum resident protein 29                       | ERP29        | ERP29              | ERP29                 | chaperone binding              | protein metabolism          | 208                                      |                        |
|                             |      |     | ↓↓  | Eukaryotic translation initiation factor 4H                     | EIF4H        | EIF4H              | IF4H                  | nucleotide binding             | nucleotide metabolism       | 159                                      |                        |
|                             |      |     | ↑   | Ezrin                                                           | EZR          | EZR                | EZRI                  | actin binding                  | structure                   | 179, 355                                 |                        |
| ↑↑                          |      |     |     | Heat shock protein beta-1                                       | HSPB1        | HSPB1              | HSPB1                 | actin organization             | structure                   | 403                                      |                        |
|                             | ↑↑   |     |     | L-lactate dehydrogenase B chain                                 | LDHB         | LDHB               | LDHB                  | carbohydrate metabolism        | energy metabolism           | 165                                      |                        |
| ↑↑                          |      |     | ↑↑  | Myosin-11                                                       | MYH11        | MYH11              | MYH11                 | muscle contraction             | structure                   | 118                                      |                        |
| ↑↑                          | ↑↑   |     | ↑↑  | Retinal dehydrogenase 2                                         | ALDH1A2      | ALDHA2             | AL1H2                 | retinol metabolism             | lipid metabolism            | 126                                      | Desmin                 |
|                             |      |     | ↓↓  | Rho GDP-dissociation inhibitor 1                                | GDIR1        | ARHGDI A           | GDIR1                 | fatty acid binding             | lipid metabolism            | 147                                      |                        |
|                             | ↑↑   |     |     | Serine/threonine-protein phosphatase PP1-beta catalytic subunit | PP1CB        | PP1CB              | PP1B                  | phosphorylation processes      | protein metabolism          | 102, 76                                  |                        |
|                             |      | ↑   |     | Serum albumin                                                   | ALB          | ALB                | ALBU                  | metal binding, transport       | transport                   | 259, 294, 548, 243, 151, 936, 824,       |                        |

|    |                                                                                                                                      |                                                                                                 |  |          |     |     |      |                        |           |                |
|----|--------------------------------------------------------------------------------------------------------------------------------------|-------------------------------------------------------------------------------------------------|--|----------|-----|-----|------|------------------------|-----------|----------------|
|    | ↑                                                                                                                                    |                                                                                                 |  | Vimentin | VIM | VIM | VIME | cytoskeleton component | structure | 274, 564, 1120 |
| 16 | ↑↑                                                                                                                                   | up-regulated compared to control (vehicle); all isoforms significantly up-regulated             |  |          |     |     |      |                        |           |                |
| 17 | ↑                                                                                                                                    | partly up-regulated compared to control (vehicle), some isoforms significantly up-regulated     |  |          |     |     |      |                        |           |                |
| 18 | ↓↓                                                                                                                                   | down-regulated compared to control (vehicle); all isoforms significantly down-regulated         |  |          |     |     |      |                        |           |                |
| 19 | ↓                                                                                                                                    | partly down-regulated compared to control (vehicle), some isoforms significantly down-regulated |  |          |     |     |      |                        |           |                |
| 20 | *according to UniProt ( <a href="http://www.uniprot.org">www.uniprot.org</a> ); **values in 1 cell indicating the different isoforms |                                                                                                 |  |          |     |     |      |                        |           |                |

21 **Table 3.** Proteins significantly differentially regulated ( $p < 0.05$ , expression  $> \pm 1.5$ ) 12 h postprandial in the blood plasma of Mongolian  
 22 Gerbils after receiving either a single dose of carotenoids lycopene (LYC), lutein (LUT), all-*trans*  $\beta$ -carotene (ATBC), retinol (ROL) or control  
 23 (Cremophor EL solution). Protein functionality (biological process involvement and protein type) according to UniProt ([www.uniprot.org](http://www.uniprot.org)). As  
 24 isoforms were determined also, proteins could also be in part up-and down-regulated at the same time.  
 25

comparison against vehicle

| LUT | ATBC | LYC | ROL | protein name                          | abbreviation | gene abbreviation* | protein abbreviation* | biological process                 | protein category            | Mascot confidence score**       |
|-----|------|-----|-----|---------------------------------------|--------------|--------------------|-----------------------|------------------------------------|-----------------------------|---------------------------------|
| ↓↓  |      |     |     | Actin, cytoplasmic 1                  | ACTB         | ACTB               | ACTB                  | cytoskeleton                       | structure                   | 93-524                          |
| ↑↑  |      | ↑↑  | ↑↑  | Adiponectin                           | ADIPO        | ADIPO              | ADIPOQ                | hormone, lipid differentiation     | lipid metabolism            | 58-714                          |
|     | ↑    |     |     | Alpha-1-antitrypsin                   | A1AT         | SERPINA1           | A1AT                  | acute phase response               | blood coagulation           | 748-3216, 106-242               |
|     |      | ↑↑  | ↑↑  | Alpha-1-macroglobulin                 | AMBPG        | A1M                | A1M                   | neurotrophic factor binding        | protein metabolism          | 1273-4862                       |
|     | ↑↑   |     |     | Alpha-2-HS-glycoprotein               | AHSG         | AHSG               | FETUA                 | acute phase response               | immune system, inflammation | 153-1721                        |
| ↓   | ↓    |     | ↓   | Alpha-2-macroglobulin                 | A2M          | A2M                | A2MG                  | calcium binding, blood coagulation | protein metabolism          | 2367-5542, 291-1594, 118-197    |
|     |      | ↑↑  | ↑↑  | Antithrombin-III                      | ANT3         | SERPINC1           | ANT3                  | blood coagulation                  | blood coagulation           | 267-1084                        |
| ↑↑  |      |     |     | AP-1 complex subunit gamma-1          | AP1G1        | AP1G1              | AP1G1                 | protein transport                  | protein metabolism          | 32-55                           |
|     |      | ↓↓  | ↓↓  | Apolipoprotein E                      | APOE         | APOE               | APOE                  | cholesterol transport              | lipid metabolism            | 101-219                         |
|     | ↑↑   |     |     | Axin-2                                | AXIN2        | AXIN2              | AXIN2                 | enzyme binding and phosphorylation | other metabolism            | 39-96                           |
|     | ↓↓   |     |     | Carboxylesterase 1C                   | CES1C        | CES1C              | EST1C                 | hydrolase, ester bonds             | detoxification              | 134-688                         |
|     |      | ↑↑  | ↑↑  | Carboxypeptidase B2                   | CPB2         | CPB2               | CPB2                  | fibrinolysis                       | blood coagulation           | 52-167                          |
|     | ↓    | ↓   | ↓   | Ceruloplasmin                         | CP           | CP                 | CERU                  | iron transport                     | transport                   | 1441-8353, 1537-9288            |
| ↑↑  | ↑↑   |     |     | Citron Rho-interacting kinase         | CIT          | CIT                | CTRO                  | cytokinesis and nervous system     | other metabolism            | 33-53                           |
| ↑↑  |      | ↑↑  | ↑↑  | Clusterin                             | CLU          | CLU                | CLUS                  | stress response, chaperone         | structure                   | 38-335                          |
| ↑↑  |      | ↑↑  | ↑↑  | Complement C1q subcomponent subunit B | C1QB         | C1QB               | C1QB                  | immune system                      | immune system, inflammation | 54-54                           |
|     |      |     | ↑↑  | Complement C1s subcomponent           | C1S          | C1S                | C1S                   | immune system                      | immune system, inflammation | 40-179                          |
|     |      | ↑↑  | ↑↑  | Complement C3                         | C3           | C3                 | CO3                   | immune system                      | immune system, inflammation | 2103-6223, 1751-6927, 2335-8014 |
|     |      | ↑↑  |     | Complement C4                         | C4           | C4                 | CO4                   | immune system                      | immune system, inflammation | 1326-3750                       |
|     | ↓↓   | ↓↓  | ↓↓  | Complement component C6               | C6           | C6                 | CO6                   | immune system                      | immune system, inflammation | 27-76                           |

|    |    |    |    |                                              |               |          |       |                              |                             |                                                          |
|----|----|----|----|----------------------------------------------|---------------|----------|-------|------------------------------|-----------------------------|----------------------------------------------------------|
|    | ↓↓ | ↓↓ |    | Complement component C9                      | C9            | C9       | CO9   | immune system                | immune system, inflammation | 32-211                                                   |
|    |    | ↑↑ | ↑↑ | Complement factor B                          | CFB           | CFB      | CFAB  | immune system                | immune system, inflammation | 66-662                                                   |
|    |    | ↑↑ |    | Fetuin-B                                     | FETUB         | FETUB    | FETUB | protease inhibitor           | protein metabolism          | 52-258                                                   |
|    |    |    | ↓  | Fibronectin                                  | FN1           | FN1      | FINC  | heparin binding              | structure                   | 515-5582, 402-5747                                       |
|    |    | ↑↑ | ↑↑ | Gelsolin                                     | GSN           | GSN      | GELS  | calcium binding              | structure                   | 847-2303                                                 |
|    | ↓↓ | ↓↓ | ↓↓ | Glutathione peroxidase 3                     | GPX3          | GPX3     | GPX3  | cell protection              | detoxification              | 36-91                                                    |
|    |    |    | ↑↑ | Haptoglobin                                  | HP            | HP       | HPT   | heme iron recycling          | detoxification              | 45-646, 114-776                                          |
| ↓  | ↑↑ | ↑↓ | ↓  | Hemoglobin subunit alpha                     | HBA1          | HBA1     | HBA   | oxygen transport             | transport                   | 113-3254, 298-3321, 325-1261, 223-1301,332-1193, 72-4314 |
| ↓  |    |    | ↓↓ | Hemoglobin subunit beta                      | HBB           | HBB      | HBB   | oxygen transport             | transport                   | 265-3283                                                 |
|    |    | ↑  | ↑  | Hemopexin                                    | HPX           | HPX      | HEMO  | oxygen transport             | transport                   | 584-2936, 366-2722                                       |
|    |    | ↑↑ | ↑↑ | Ig gamma-2A chain C region secreted form     | GCAB          | na       | AGCAB | antigen binding              | immune system, inflammation | 485-1849                                                 |
| ↓↓ | ↓↓ |    |    | Ig heavy chain V region 441                  | HVM36         | na       | HVM36 | antigen binding              | immune system, inflammation | 82-682                                                   |
| ↓↓ | ↓↓ |    | ↓↓ | Ig kappa chain V19-17                        | IGK19-17      | IGK19-17 | KV5A1 | antigen binding              | immune system, inflammation | 74-124                                                   |
| ↑↑ |    | ↑↑ | ↑↑ | Ig kappa chain V-I region S107A              | IGKS170AKV1A1 | IGKV-33  | KV1A1 | antigen binding              | immune system, inflammation | 36-127                                                   |
| ↑  |    |    | ↑  | Ig kappa chain V-V regions                   | IGKVKV5AG     | na       | KV5AG | antigen binding              | immune system, inflammation | 30-60, 33-111                                            |
|    | ↓↓ |    |    | Inter-alpha-trypsin inhibitor, heavy chain 4 | ITIH4         | ITIH4    | ITIH4 | acute phase response         | immune system, inflammation | 51-227                                                   |
|    |    | ↓  | ↓  | Inter-alpha-trypsin inhibitor heavy chain H1 | ITIH1         | ITIH1    | ITIH1 | acute phase response         | immune system, inflammation | 227-917, 134-657                                         |
|    |    | ↑↑ | ↑↑ | Inter-alpha-trypsin inhibitor heavy chain H2 | ITIH2         | ITIH2    | ITIH2 | acute phase response         | immune system, inflammation | 582-3410, 1182-2855                                      |
|    |    | ↑  | ↑  | Inter-alpha-trypsin inhibitor heavy chain H3 | ITIH3         | ITIH3    | ITIH3 | acute phase response         | immune system, inflammation | 150-1100, 171-850, 170-1026                              |
|    | ↓  |    |    | Keratin, type I cytoskeletal 10              | KRT10         | KRT10    | K1C10 | cytoskeleton protein binding | structure                   | 71-1655, 57-783                                          |
|    | ↓↓ | ↓↓ |    | Keratin, type I cytoskeletal 15              | KRT15         | KRT15    | K1C15 | cytoskeleton protein binding | structure                   | 89-256                                                   |
|    |    |    | ↑↑ | Keratin, type II cytoskeletal 1              | KRT1          | KRT1     | K2C1  | cytoskeleton protein binding | structure                   | 62-3834                                                  |
|    |    |    | ↑↑ | Keratin, type II cytoskeletal 2 oral         | KRT76         | K22O     | KRT76 | cytoskeleton protein binding | structure                   | 136-502                                                  |
|    |    | ↑  | ↑  | Keratin, type II cytoskeletal 6A             | KRT6A         | KRT6A    | K2C6A | cytoskeleton protein binding | structure                   | 421-2251, 256-893                                        |
|    |    |    | ↑↑ | Keratin, type II cytoskeletal 79             | KRT79         | KRT79    | K2C79 | cytoskeleton protein binding | structure                   | 234-1524                                                 |
|    | ↓↓ | ↓↓ | ↑↑ | Keratin, type II cytoskeletal 8              | KRT8          | KRT8     | K2C8  | cytoskeleton protein binding | structure                   | 67-945                                                   |

|    |    |    |    |                                                      |           |           |       |                        |                             |                                                      |
|----|----|----|----|------------------------------------------------------|-----------|-----------|-------|------------------------|-----------------------------|------------------------------------------------------|
| ↑↑ |    |    |    | Lumican                                              | LUM       | LUM       | LUM   | collagen binding       | structure                   | 80-80                                                |
| ↑  | ↑  | ↑  | ↑  | Murinoglobulin-2                                     | MUG2      | MUG2      | MUG2  | protease inhibitor     | protein metabolism          | 471-1709, 1505-4710                                  |
|    |    | ↑↑ | ↑↑ | Pecanex-like protein 2                               | PCNX2     | PCNX2     | PCX   | tumorigenesis          | transport                   | 31-61                                                |
| ↓↓ | ↓↓ | ↓↓ | ↓↓ | Peroxiredoxin-2                                      | PRDX2     | PRDX2     | PRDX2 | antioxidant response   | detoxification              | 65-73                                                |
|    | ↓↓ |    |    | Phosphatidylinositol-glycan-specific phospholipase D | GPLD1     | GPLD1     | PHLD  | cell migration         | protein metabolism          | 104-504                                              |
|    | ↑↓ | ↑↓ | ↑↓ | Plasma protease C1 inhibitor                         | SERPING1  | SERPING1  | IC1   | aging                  | protein metabolism          | 209-1020, 282-634                                    |
|    |    | ↑  |    | Plasminogen                                          | PLG       | PLG       | PLMN  | blood coagulation      | blood coagulation           | 259-2401, 278-2285                                   |
|    |    | ↑↑ |    | Protein AMBP                                         | AMBP      | AMBP      | AMBP  | cell adhesion          | protein metabolism          | 1353-4311                                            |
| ↓↓ | ↓↓ | ↓↓ | ↓↓ | Protein VPRBP                                        | VPRBP     | DCAF1     | DCAF1 | protein ubiquitination | protein metabolism          | 75-105                                               |
| ↑  | ↓  |    |    | Protein Z-dependent protease inhibitor               | SERPINA10 | SERPINA10 | ZPI   | blood coagulation      | blood coagulation           | 54-808, 67-193                                       |
| ↑↓ | ↑  | ↑  | ↑↓ | Prothrombin                                          | F2        | F2        | THRB  | acute phase response   | blood coagulation           | 135-820, 46-424                                      |
| ↑↑ | ↑↑ | ↑↑ | ↑↑ | Serine protease inhibitor A3N                        | SERPINA3N | SERPINA3N | SPA3N | protease inhibitor     | protein metabolism          | 324-3672                                             |
|    |    | ↑↑ | ↑↑ | Serotransferrin                                      | TF        | TF        | TRFE  | iron transport         | transport                   | 3171-8148, 2415-6337                                 |
|    |    | ↓  | ↓  | Serum albumin                                        | ALB       | ALB       | ALBU  | various metabolism     | transport                   | 112184-303439, 19049-40637, 12996-63725, 21692-79508 |
|    |    |    | ↑  | Serum paraoxonase/arylesterase 1                     | PON1      | PON1      | PON1  | hydrolase              | detoxification              | 123-830, 270-1731                                    |
|    |    | ↓↓ | ↓↓ | Terminal uridylyltransferase 7                       | ZCCHC6    | ZCCHC6    | TUT7  | RNA binding            | other metabolism            | 35-60                                                |
|    |    |    | ↓↓ | Thrombospondin-1                                     | THBS1     | THBS1     | TSP1  | collagen binding       | immune system, inflammation | 66-351                                               |
| ↓↓ | ↓↓ | ↓↓ | ↓↓ | Titin                                                | TTN       | TTN       | TITIN | actin filament binding | structure                   | 24-36                                                |
|    |    | ↑↑ | ↑↑ | Transthyretin                                        | TTR       | TTR       | TTHY  | retinol binding        | transport                   | 95-515                                               |
|    |    | ↓  |    | Vitamin D-binding protein                            | GC        | GC        | VTDB  | vitamin D metabolims   | lipid metabolism            | 436-1014, 219-555                                    |

26 ↑↑ up-regulated compared to control (vehicle); all isoforms significantly up-regulated

27 ↑ partly up-regulated compared to control (vehicle), some isoforms significantly up-regulated

28 ↓↓ down-regulated compared to control (vehicle); all isoforms significantly down-regulated

29 ↓ partly down-regulated compared to control (vehicle), some isoforms significantly down-regulated

30 ↑↓ up- and down-regulated compared to control (vehicle)

31 \*according to UniProt ([www.uniprot.org](http://www.uniprot.org))

32 \*\*range given for protein determination in the different plasma samples of individual animals, comma-separators indicate ranges for different isoforms

33

34
